# Supplementary material for: Therapeutic applications of gut microbes in cardiometabolic diseases: current state and perspectives
Source: PubMed Central journal article supplement (PMC10799778; doi:10.1007/s00253-024-13007-7), 2024-01-20
Supplement: 253_2024_13007_MOESM1_ESM.pdf [file 253_2024_13007_MOESM1_ESM.pdf]

## **APPLIED MICROBIOLOGY AND BIOTECHNOLOGY**

Therapeutic applications of gut microbes in cardiometabolic diseases:  
current state and perspectives

Lin Yuan <sup>a,b</sup>, Ying Li <sup>b</sup>, Moutong Chen <sup>b</sup>, Liang Xue <sup>b</sup>, Juan Wang <sup>d</sup>, Yu  
Ding <sup>c</sup>, Qihui Gu<sup>b</sup>, Jumei Zhang <sup>b</sup>, Hui Zhao <sup>b</sup>, Xinqiang Xie <sup>b,\*</sup> and  
Qingping Wu <sup>b,\*</sup>

*<sup>a</sup> School of Food and Biological Engineering, Shaanxi University of Science and  
Technology, Xi'an 710021, China; gdim\_yuanlin@163.com (L.Y.)*

*<sup>b</sup> Guangdong Provincial Key Laboratory of Microbial Safety and Health, State Key  
Laboratory of Applied Microbiology Southern China, Institute of Microbiology, Key  
Laboratory of Agricultural Microbiomics and Precision Application, Ministry of  
Agriculture and Rural Affairs, Guangdong Academy of Sciences, Guangzhou 510070,  
China;*

*<sup>c</sup> Department of Food Science and Engineering, Institute of Food Safety and Nutrition,  
College of Science & Engineering, Jinan University, Guangzhou 510632, China;*

*<sup>d</sup> College of Food Science, South China Agricultural University, Guangzhou 510642,  
China;*

\* Correspondence: woshixinqiang@126.com (X.X.); wuqp203@163.com (Q.W.)

Affiliation: Institute of Microbiology, Guangdong Academy of Sciences.

No. 100, Xianlie Zhong Road, Yuexiu District, Guangzhou 510070, P. R. China

Tel/Fax: +86-20-87688132

Email: [wuqp203@163.com](mailto:wuqp203@163.com)

Table S1. Altered gut microbial compositions associated with hypertension

Table S2 Altered Intestinal Microbiota Composition Associated with Atherosclerosis

Table S1. Altered gut microbial compositions associated with hypertension

| First Author<br>(Ref. #), Year   | Sample                                                                         | Technique | Increase in<br>hypertension                                                  | Decrease in<br>hypertension                                                                                                                                                                                       |
|----------------------------------|--------------------------------------------------------------------------------|-----------|------------------------------------------------------------------------------|-------------------------------------------------------------------------------------------------------------------------------------------------------------------------------------------------------------------|
| Mell et al. [1],<br>2015         | Dahl salt-<br>resistant rats                                                   | 16S       | Plasma acetate and<br>heptanoate                                             | S24-7,<br><i>Veillonellaceae</i>                                                                                                                                                                                  |
| Gomez-Arango<br>et al. [2], 2016 | obese pregnant<br>women                                                        | 16S       |                                                                              | <i>Butyrate-producing<br/>bacteria Odoribacter</i>                                                                                                                                                                |
| Jackson et al.<br>[3], 2019      | 756<br>hypertensive<br>patients,<br>1790 controls                              | 16S       | <i>Lactobacillaceae,</i><br><i>Streptococcaceae</i>                          | <i>Dehalobacteriaceae,</i><br><i>Christensenellaceae,</i><br><i>Oxalobacteraceae,</i><br><i>Mollicutes,</i><br><i>Rikenellaceae,</i><br><i>Clostridia,</i><br><i>Anaeroplasmataceae,</i><br><i>Peptococcaceae</i> |
| Huart et al. [4],<br>2019        | 38 hypertensive<br>patients, 7 pre-<br>hypertensive<br>patients,<br>9 controls | 16S       | <i>Clostridium<br/>sensu stricto</i>                                         | <i>Ruminococcaceae,</i><br><i>Clostridiales</i>                                                                                                                                                                   |
| Verhaar et al.<br>[5], 2020      | 4672 subjects                                                                  | 16S       | <i>Streptococcus</i>                                                         | <i>Roseburia,</i><br><i>Clostridium<br/>sensu stricto,</i><br><i>Roseburia<br/>hominis, Romboutsia,</i><br><i>Ruminococcaceae,</i><br><i>Enterorhabdus</i>                                                        |
| Iñaki Robles et<br>al.[6], 2021  | 8 DOCA-salt<br>rats                                                            | 16S       | <i>lactate-producing<br/>bacteria</i>                                        | <i>Oscillospira</i>                                                                                                                                                                                               |
| Larissa et al.<br>[7], 2021      | hypertensive<br>rats induced by<br>high-fat diet                               | 16S       | <i>Lactobacillales,</i><br><i>Clostridiales,</i><br><i>Enterobacteriales</i> | <i>Bacteroidales,</i><br><i>Desulfovibrionales,</i><br><i>Methanobacteriales,</i><br><i>Gastranaerophilales,</i><br><i>Selenomonadales.</i>                                                                       |
| Chao-Yue et al.<br>[8], 2021     | Spontaneously<br>hypertensive<br>rats                                          | 16S       | <i>the ratio between<br/>Firmicutes and<br/>Bacteroidetes</i>                |                                                                                                                                                                                                                   |

|                              |                                            |     |                                                                                                                      |                                                                                   |
|------------------------------|--------------------------------------------|-----|----------------------------------------------------------------------------------------------------------------------|-----------------------------------------------------------------------------------|
| Haicui et al. [9], 2022      | hypertensive rats                          | 16S | <i>Proteobacteria</i>                                                                                                | <i>Bacteroidales_S24-7</i>                                                        |
| Georgianna et al. [10], 2022 | hypertensive rats induced by high-fat diet | 16S | <i>Lachnospiraceae</i> ,<br><i>Clostridiaceae I</i> ,<br><i>Peptostreptococcaceae</i> ,<br><i>Enterobacteriaceae</i> | <i>Ruminococcaceae</i> ,<br><i>Methanobacteriaceae</i> ,<br><i>Muribaculaceae</i> |
| Lin et al.[11], 2022         | L-NAME-induced hypertensive rats           | 16S | <i>Christensenellaceae</i> ,<br><i>Streptococcaceae</i> ,<br>UUG-010                                                 |                                                                                   |

Table S2 Altered Intestinal Microbiota Composition Associated with Atherosclerosis and coronary artery disease

| First Author (Ref. #), Year | Sample                                                       | Technique         | Increase in CVD                                                                   | Decrease in CVD                                                                               |
|-----------------------------|--------------------------------------------------------------|-------------------|-----------------------------------------------------------------------------------|-----------------------------------------------------------------------------------------------|
| Yin et al.[12], 2015        | 141 stroke/TIA patients vs. 94 asymptomatic control subjects | 16S rRNA          | <i>Enterobacteriaceae</i><br><i>Proteobacteria</i><br><i>Escherichia/Shigella</i> | <i>Bacterioidetes</i><br><i>Bacteroidales</i><br><i>Bacteroidaceae</i><br><i>Bacterioides</i> |
| Feng et al. [13], 2016      | 59 CAD patients vs. 43 healthy control subjects              | Fecal metagenome  | <i>Streptococcus sp.</i><br>M334 and M143<br><i>Clostridium sp.</i><br>HGF2       |                                                                                               |
| Jie et al.[14], 2017        | 218 ACVD and 187 healthy controls.                           | Fecal Metagenomic | <i>Streptococcus and Escherichia</i>                                              | <i>Bacteroides and Prevotella</i>                                                             |
| Kasahara et al.[15],2018    | Atherosclerotic murine model                                 | 16S sequencing    |                                                                                   | <i>Roseburia</i>                                                                              |
| Zhiyang et al. [16], 2021   | Atherosclerotic mice model                                   | 16S sequencing    | <i>Helicobacter spp.</i>                                                          |                                                                                               |
| Xiao-Lin et al. [17], 2022  | Atherosclerotic mice model                                   | 16S sequencing    | <i>Firmicutes</i>                                                                 | <i>Bacterioidetes</i>                                                                         |

## Reference

- [1] B. Mell, V.R. Jala, A.V. Mathew, J. Byun, H. Waghulde, Y. Zhang, B. Haribabu, M. Vijay-Kumar, S. Pennathur, B. Joe, Evidence for a link between gut microbiota and hypertension in the Dahl rat, *Physiological genomics* 47(6) (2015) 187-197.
- [2] L.F. Gomez-Arango, H.L. Barrett, H.D. McIntyre, L.K. Callaway, M. Morrison, M.D. Nitert, S.T. Grp, Increased Systolic and Diastolic Blood Pressure Is Associated With Altered Gut Microbiota Composition and Butyrate Production in Early Pregnancy, *Hypertension* 68(4) (2016) 974-981.
- [3] M.A. Jackson, S. Verdi, M.-E. Maxan, C.M. Shin, J. Zierer, R.C. Bowyer, T. Martin, F.M. Williams, C. Menni, J.T. Bell, Gut microbiota associations with common diseases and prescription medications in a population-based cohort, *Nature communications* 9(1) (2018) 1-8.
- [4] J. Huart, J. Leenders, B. Taminiiau, J. Descy, A. Saint-Remy, G. Daube, J.-M. Krzesinski, P. Melin, P. de Tullio, F. Jouret, Gut Microbiota and Fecal Levels of Short-Chain Fatty Acids Differ Upon 24-Hour Blood Pressure Levels in Men, *Hypertension* 74(4) (2019) 1005-1013.
- [5] B.J. Verhaar, D. Collard, A. Prodan, J.H. Levels, A.H. Zwinderman, F. Bäckhed, L. Vogt, M.J. Peters, M. Muller, M. Nieuwdorp, Associations between gut microbiota, faecal short-chain fatty acids, and blood pressure across ethnic groups: the HELIUS study, *European heart journal* 41(44) (2020) 4259-4267.
- [6] I. Robles-Vera, N. de la Visitación, M. Toral, M. Sánchez, M. Romero, M. Gómez-Guzmán, F. Vargas, J. Duarte, R. Jiménez, Changes in Gut Microbiota Induced by Doxycycline Influence in Vascular Function and Development of Hypertension in DOCA-Salt Rats, *Nutrients* 13(9) (2021) 2971.
- [7] L.R. Brandão, J.L. de Brito Alves, W.K.A. da Costa, G.d.A.H. Ferreira, M.P. de Oliveira, A.G. da Cruz, V. de Andrade Braga, J. de Souza Aquino, H. Vidal, M.F. Noronha, Live and ultrasound-inactivated *Lacticaseibacillus casei* modulate the intestinal microbiota and improve biochemical and cardiovascular parameters in male rats fed a high-fat diet, *Food Function* 12(12) (2021) 5287-5300.
- [8] C.-Y. Kong, Z.-M. Li, Y.-Q. Mao, H.-L. Chen, W. Hu, B. Han, L.-S. Wang, Probiotic yogurt blunts the increase of blood pressure in spontaneously hypertensive rats via remodeling of the gut microbiota, *Food Function* 12(20) (2021) 9773-9783.
- [9] H. Wu, L. Jiang, T.-F. Shum, J. Chiou, Elucidation of anti-hypertensive mechanism by a novel *Lactobacillus rhamnosus* AC1 fermented soymilk in the deoxycorticosterone acetate-salt hypertensive rats, *Nutrient* 14(15) (2022) 3174.
- [10] G. de Araújo Henriques Ferreira, M. Magnani, L. Cabral, L.R. Brandão, M.F. Noronha, J. de Campos Cruz, E.L. de Souza, J.L. de Brito Alves, Potentially probiotic *limosilactobacillus fermentum* Fruit-Derived strains alleviate cardiometabolic disorders and gut microbiota impairment in male rats fed a high-Fat diet, *Probiotics Antimicrobial Proteins* 14(2) (2022) 349-359.
- [11] L. Yuan, Y. Li, M. Chen, L. Xue, J. Wang, Y. Ding, J. Zhang, S. Wu, Q. Ye, S. Zhang, R. Yang, H. Zhao, L. Wu, T. Liang, X. Xie, Q. Wu, Antihypertensive Activity

- of Milk Fermented by *Lactiplantibacillus plantarum* SR37-3 and SR61-2 in L-NAME-Induced Hypertensive Rats, *Foods* 11(15) (2022).
- [12] J. Yin, S.X. Liao, Y. He, S. Wang, G.H. Xia, F.T. Liu, J.J. Zhu, C. You, Q. Chen, L. Zhou, Dysbiosis of gut microbiota with reduced trimethylamine-N-oxide level in patients with large-artery atherosclerotic stroke or transient ischemic attack, *Journal of the American Heart Association* 4(11) (2015) e002699.
- [13] Q. Feng, Z. Liu, S. Zhong, R. Li, H. Xia, Z. Jie, B. Wen, X. Chen, W. Yan, Y. Fan, Integrated metabolomics and metagenomics analysis of plasma and urine identified microbial metabolites associated with coronary heart disease, *Scientific reports* 6(1) (2016) 1-14.
- [14] Z. Jie, H. Xia, S.-L. Zhong, Q. Feng, S. Li, S. Liang, H. Zhong, Z. Liu, Y. Gao, H. Zhao, The gut microbiome in atherosclerotic cardiovascular disease, *Nature communications* 8(1) (2017) 1-12.
- [15] K. Kasahara, K.A. Krautkramer, E. Org, K.A. Romano, R.L. Kerby, E.I. Vivas, M. Mehrabian, J.M. Denu, F. Bäckhed, A.J. Lusis, Interactions between *Roseburia intestinalis* and diet modulate atherogenesis in a murine model, *Nature microbiology* 3(12) (2018) 1461-1471.
- [16] Z. Lv, X. Shan, Q. Tu, J. Wang, J. Chen, Y. Yang, Ginkgolide B treatment regulated intestinal flora to improve high-fat diet induced atherosclerosis in ApoE<sup>-/-</sup> mice, *Biomedicine Pharmacotherapy* 134 (2021) 111100.
- [17] X.L. Li, J.J. Cui, W.S. Zheng, J.L. Zhang, R. Li, X.L. Ma, M. Lin, H.H. Guo, C. Li, X.Y. Yu, Bicyclol Alleviates Atherosclerosis by Manipulating Gut Microbiota, *Small* 18(9) (2022) 2105021.
